# Supplementary material for: Co-registration and residual correction of digital elevation models: a comparative study
Source: Copernicus journal article supplement (doi:10.5194/tc-17-5299-2023), 2023-12-14
Supplement: Supplementary file 1 [file tc-17-5299-2023-supplement.pdf]

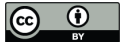

*Supplement of*

## **Co-registration and residual correction of digital elevation models: a comparative study**

**Tao Li et al.**

*Correspondence to:* Xiang Shen (shen@apm.ac.cn)

The copyright of individual parts of the supplement might differ from the article licence.

## **Contents of this file**

Greenland Ice Sheet (GrIS) case study

High Mountain Asia (HMA) case study

5 New Zealand (NZL) case study

The method of NH

## **Abbreviations**

NK: the method of Nuth and Kääb

RT: the method of Rosenholm and Torlegard

10 NH: the method of Noh and Howat

## 1. GrIS case study

**Table S1.** Co-registration results of the 23 DEM pairs in GrIS. The MedAD values of the RT method are presented and compared with the linear version of the NK method.

| Pair ID | DEM   | Roles     | Date        | Resolution (m) | Scene ID                | MedAD (Reduced) |
|---------|-------|-----------|-------------|----------------|-------------------------|-----------------|
| GrIS-1  | ASTER | Reference | 5 Aug 2014  | 30             | AST14DEM.003:2133338256 | 6.140 (11.8%)   |
|         | ASTER | Secondary | 7 Aug 2003  | 30             | AST14DEM.003:2015893657 |                 |
| GrIS-2  | ASTER | Reference | 25 Jul 2016 | 30             | AST14DEM.003:2237110490 | 5.916 (0.4%)    |
|         | ASTER | Secondary | 17 Jun 2002 | 30             | AST14DEM.003:2007321075 |                 |
| GrIS-3  | ASTER | Reference | 21 Aug 2020 | 30             | AST14DEM.003:2396978128 | 6.176 (9.8%)    |
|         | ASTER | Secondary | 16 Jun 2019 | 30             | AST14DEM.003:2341532177 |                 |
| GrIS-4  | ASTER | Reference | 25 Jul 2016 | 30             | AST14DEM.003:2237110490 | 5.580 (1.7%)    |
|         | ASTER | Secondary | 11 Jul 2005 | 30             | AST14DEM.003:2030001029 |                 |
| GrIS-5  | ASTER | Reference | 5 Aug 2003  | 30             | AST14DEM.003:2015777895 | 6.749 (5.3%)    |
|         | ASTER | Secondary | 26 Jun 2006 | 30             | AST14DEM.003:2034745465 |                 |
| GrIS-6  | ASTER | Reference | 6 Jun 2007  | 30             | AST14DEM.003:2043591221 | 12.289 (1.2%)   |
|         | ASTER | Secondary | 21 Jul 2012 | 30             | AST14DEM.003:2119138452 |                 |
| GrIS-7  | ASTER | Reference | 17 Jun 2002 | 30             | AST14DEM.003:2007321076 | 6.827 (8.6%)    |
|         | ASTER | Secondary | 11 Jul 2005 | 30             | AST14DEM.003:2030001032 |                 |
| GrIS-8  | ASTER | Reference | 17 Jun 2002 | 30             | AST14DEM.003:2007321076 | 5.301 (0.9%)    |
|         | ASTER | Secondary | 25 Jul 2016 | 30             | AST14DEM.003:2237110508 |                 |
| GrIS-9  | ASTER | Reference | 17 Jun 2002 | 30             | AST14DEM.003:2007321076 | 5.612 (0.1%)    |
|         | ASTER | Secondary | 6 Jul 2003  | 30             | AST14DEM.003:2015233147 |                 |
| GrIS-10 | ASTER | Reference | 17 Jun 2002 | 30             | AST14DEM.003:2007321076 | 5.423 (2.9%)    |
|         | ASTER | Secondary | 22 Jun 2004 | 30             | AST14DEM.003:2024616433 |                 |
| GrIS-11 | ASTER | Reference | 5 Aug 2003  | 30             | AST14DEM.003:2015777888 | 7.900 (15.3%)   |
|         | ASTER | Secondary | 26 Jun 2006 | 30             | AST14DEM.003:2034745466 |                 |
| GrIS-12 | ASTER | Reference | 5 Jul 2006  | 30             | AST14DEM.003:2034888289 | 8.794 (0.3%)    |
|         | ASTER | Secondary | 17 Aug 2016 | 30             | AST14DEM.003:2240132072 |                 |
| GrIS-13 | ASTER | Reference | 5 Jul 2006  | 30             | AST14DEM.003:2034888289 | 6.687 (0.7%)    |
|         | ASTER | Secondary | 11 Jul 2014 | 30             | AST14DEM.003:2132976700 |                 |
| GrIS-14 | ASTER | Reference | 5 Jul 2006  | 30             | AST14DEM.003:2034888289 | 5.132 (2.0%)    |
|         | ASTER | Secondary | 21 Jul 2006 | 30             | AST14DEM.003:2035293364 |                 |
| GrIS-15 | ASTER | Reference | 26 Jul 2017 | 30             | AST14DEM.003:2267749658 | 5.641 (0.4%)    |
|         | ASTER | Secondary | 1 Aug 2019  | 30             | AST14DEM.003:2345264318 |                 |
| GrIS-16 | ASTER | Reference | 26 Jul 2017 | 30             | AST14DEM.003:2267749658 | 7.436 (2.7%)    |
|         | ASTER | Secondary | 19 Aug 2020 | 30             | AST14DEM.003:2396408309 |                 |
| GrIS-17 | ASTER | Reference | 19 Aug 2020 | 30             | AST14DEM.003:2396408312 | 6.795 (4.0%)    |
|         | ASTER | Secondary | 1 Aug 2019  | 30             | AST14DEM.003:2345264317 |                 |
| GrIS-18 | ASTER | Reference | 19 Aug 2020 | 30             | AST14DEM.003:2396408312 | 5.903 (5.9%)    |
|         | ASTER | Secondary | 26 Jul 2017 | 30             | AST14DEM.003:2267749652 |                 |
| GrIS-19 | ASTER | Reference | 19 Aug 2020 | 30             | AST14DEM.003:2396408317 | 5.895 (9.2%)    |
|         | ASTER | Secondary | 1 Aug 2019  | 30             | AST14DEM.003:2345264332 |                 |
| GrIS-20 | ASTER | Reference | 8 Aug 2016  | 30             | AST14DEM.003:2238723197 | 7.561 (1.1%)    |
|         | ASTER | Secondary | 2 Aug 2008  | 30             | AST14DEM.003:2066350356 |                 |
| GrIS-21 | ASTER | Reference | 8 Aug 2016  | 30             | AST14DEM.003:2238723197 | 8.524 (1.8%)    |
|         | ASTER | Secondary | 2 Jul 2020  | 30             | AST14DEM.003:2384667768 |                 |
| GrIS-22 | ASTER | Reference | 17 Jun 2002 | 30             | AST14DEM.003:2007321076 | 5.620 (0.2%)    |
|         | ASTER | Secondary | 6 Jul 2003  | 30             | AST14DEM.003:2015233147 |                 |
| GrIS-23 | ASTER | Reference | 17 Jun 2002 | 30             | AST14DEM.003:2007321076 | 9.403 (11.8%)   |

15 2. HMA case study

**Table S2.** Co-registration results of the 22 DEM pairs in HMA. The MedAD values of the RT method are presented and compared with the linear version of the NK method.

| Pair ID | DEM        | Roles     | Date           | Resolution (m) | Scene ID                           | MedAD (Reduced) |
|---------|------------|-----------|----------------|----------------|------------------------------------|-----------------|
| HMA-1   | Copernicus | Reference | 2011–2015      | 30             | N37E073, N38E073                   | 0.780 (83.3%)   |
|         | ZY-3       | Secondary | 8 Oct 2017     | 30             | —                                  |                 |
| HMA-2   | ASTER      | Reference | 22 Aug 2005    | 30             | AST14DEM.003:2030590191            | 7.561 (11.2%)   |
|         | ASTER      | Secondary | 7 Sept 2005    | 30             | AST14DEM.003:2030819798            |                 |
| HMA-3   | SRTM       | Reference | 11–22 Feb 2000 | 30             | N39E073                            | 6.366 (26.0%)   |
|         | ASTER      | Secondary | 22 Aug 2005    | 30             | AST14DEM.003:2030590191            |                 |
| HMA-4   | SRTM       | Reference | 11–22 Feb 2000 | 30             | N39E073                            | 5.790 (8.6%)    |
|         | ASTER      | Secondary | 7 Sept 2005    | 30             | AST14DEM.003:2030819798            |                 |
| HMA-5   | SRTM       | Reference | 11–22 Feb 2000 | 30             | N39E072, N39E073, N38E072, N38E073 | 8.060 (17.5%)   |
|         | ASTER      | Secondary | 22 Mar 2005    | 30             | AST14DEM.003:2028219582            |                 |
| HMA-6   | ZY-3       | Reference | 8 Oct 2017     | 30             | —                                  | 5.063 (17.4%)   |
|         | ASTER      | Secondary | 10 Oct 2017    | 30             | AST14DEM.003:2280543414            |                 |
| HMA-7   | ASTER      | Reference | 10 Oct 2017    | 30             | AST14DEM.003:2280543414            | 6.621 (8.3%)    |
|         | ASTER      | Secondary | 26 Oct 2017    | 30             | AST14DEM.003:2281248034            |                 |
| HMA-8   | ZY-3       | Reference | 8 Oct 2017     | 30             | —                                  | 8.468 (19.3%)   |
|         | ASTER      | Secondary | 26 Oct 2017    | 30             | AST14DEM.003:2281248034            |                 |
| HMA-9   | ZY-3       | Reference | 8 Oct 2017     | 30             | —                                  | 9.004 (13.5%)   |
|         | ASTER      | Secondary | 3 Oct 2017     | 30             | AST14DEM.003:2280252518            |                 |
| HMA-10  | Copernicus | Reference | 2011–2015      | 30             | N36E071                            | 1.429 (42.3%)   |
|         | ZY-3       | Secondary | 2 Dec 2016     | 30             | —                                  |                 |
| HMA-11  | Copernicus | Reference | 2011–2015      | 30             | N38E072, N38E073                   | 2.296 (31.9%)   |
|         | ZY-3       | Secondary | 28 Sept 2017   | 30             | —                                  |                 |
| HMA-12  | Copernicus | Reference | 2011–2015      | 30             | N38E074, N38E075                   | 1.081 (31.5%)   |
|         | ZY-3       | Secondary | 31 Dec 2017    | 30             | —                                  |                 |
| HMA-13  | ASTER      | Reference | 25 Sept 2020   | 30             | AST14DEM.003:2406369987            | 9.954 (9.6%)    |
|         | ASTER      | Secondary | 27 Oct 2020    | 30             | AST14DEM.003:2421038656            |                 |
| HMA-14  | ASTER      | Reference | 21 Sept 2021   | 30             | AST14DEM.003:2487838647            | 6.818 (20.0%)   |
|         | ASTER      | Secondary | 6 Jul 2022     | 30             | AST14DEM.003:2555146603            |                 |
| HMA-15  | ASTER      | Reference | 30 Jul 2020    | 30             | AST14DEM.003:2391299920            | 11.613 (0.2%)   |
|         | ASTER      | Secondary | 8 Oct 2022     | 30             | AST14DEM.003:2566467729            |                 |
| HMA-16  | Copernicus | Reference | 2011–2015      | 30             | N38E074, N38E075                   | 6.975 (6.0%)    |
|         | ASTER      | Secondary | 9 Sept 2020    | 30             | AST14DEM.003:2401419492            |                 |
| HMA-17  | Copernicus | Reference | 2011–2015      | 30             | N38E072                            | 8.395 (5.6%)    |
|         | ASTER      | Secondary | 27 Jul 2022    | 30             | AST14DEM.003:2556749721            |                 |
| HMA-18  | ASTER      | Reference | 4 Jul 2022     | 30             | AST14DEM.003:2554781302            | 5.162 (2.4%)    |
|         | ASTER      | Secondary | 5 Aug 2022     | 30             | AST14DEM.003:2557726160            |                 |
| HMA-19  | SRTM       | Reference | 11–22 Feb 2000 | 30             | N37E071                            | 4.246 (0.7%)    |
|         | ZY-3       | Secondary | 17 Sept 2018   | 30             | —                                  |                 |
| HMA-20  | SRTM       | Reference | 11–22 Feb 2000 | 30             | N37E070, N38E070                   | 6.605 (5.9%)    |
|         | ZY-3       | Secondary | 30 Jun 2018    | 30             | —                                  |                 |
| HMA-21  | SRTM       | Reference | 11–22 Feb 2000 | 30             | N37E070, N38E070, N37E071          | 6.238 (2.0%)    |

|        |      |           |                |    |                  |              |
|--------|------|-----------|----------------|----|------------------|--------------|
|        | ZY-3 | Secondary | 19 Sept 2016   | 30 | —                |              |
| HMA-22 | SRTM | Reference | 11–22 Feb 2000 | 30 | N37E071, N38E071 | 8.541 (3.3%) |
|        | ZY-3 | Secondary | 7 Sept 2018    | 30 | —                |              |

Some representative results are demonstrated below. Since the three versions of the NK method always produce similar co-registration results, we only compare the linear version of the NK method with the RT method to make figures clear.

1) Large fraction of glacier areas vs. stable terrain.

The DEM pair HMA-5 is located in the northern Pamirs, covered by a great number of mountain glaciers. We removed the saturated pixels over bright snow-covered areas (e.g., upstream of Bol and Oktyabrskiy glaciers). It can be seen from Fig. S1 that the RT method effectively eliminates the residuals in the east-west direction of the NK results.

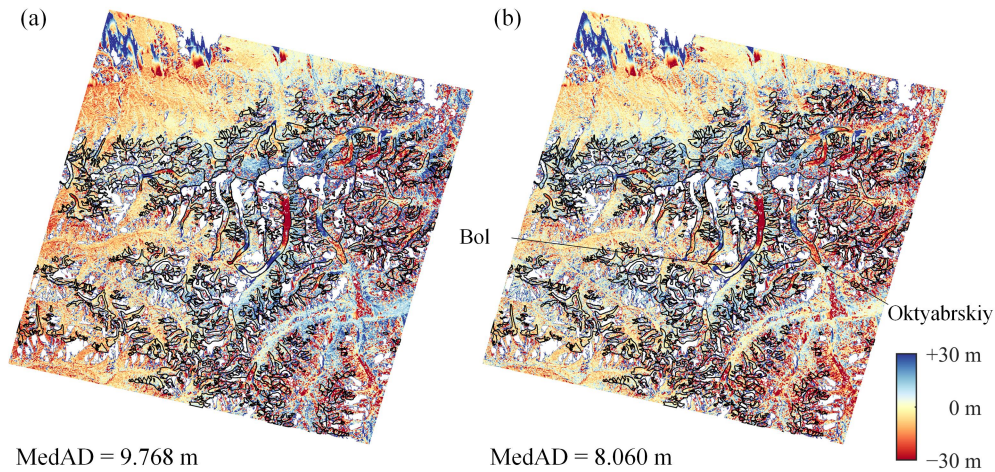

**Figure S1.** Co-registration results of the HMA-5 DEM pair. The NK method (a) and the RT method (b). The black lines mark the RGI 6.0 glacier outlines.

2) Reference DEM and secondary DEM are measured at a very short time interval

In addition to the ASTER DEM pair HMA-3 in the manuscript, HMA-6 is also used for validating the co-registration results over ice-covered terrain. The DEM pair consists of ZY-3 DEM 20171008 and ASTER DEM 20171010, which are measured two days apart. The co-registration results of the NK method show systematic errors in the southwest-northeast direction, resulting in a significantly negative bias ( $-11.826$  m) in the northeast region (within the red circle in Fig. S2a). In contrast, the glacier elevation changes estimated by the RT method are much closer to zero.

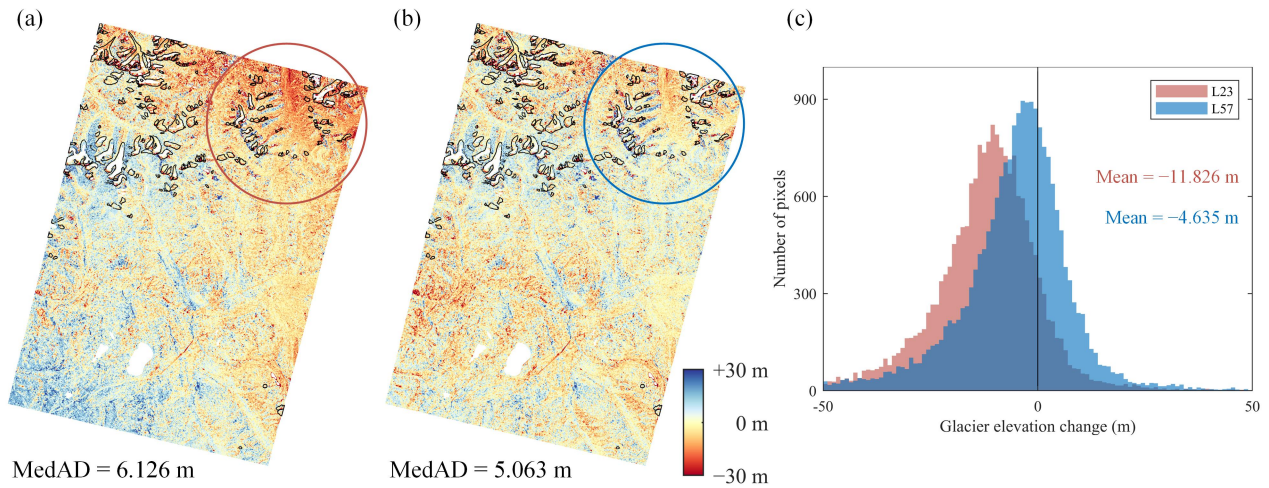

35 **Figure S2.** Co-registration results of the HMA-6 DEM pair. The NK method (a) and the RT method (b). The black lines mark the RGI 6.0 glacier outlines. The histogram of elevation change for glaciers within the circle (c).

3) The rough topography leads to a high noise level in the DEMs

Figure S3 depicts the co-registration results of the DEM pair HMA-7 with a high noise level. The co-registration error of the RT method is 8.3% smaller than that of the NK method.

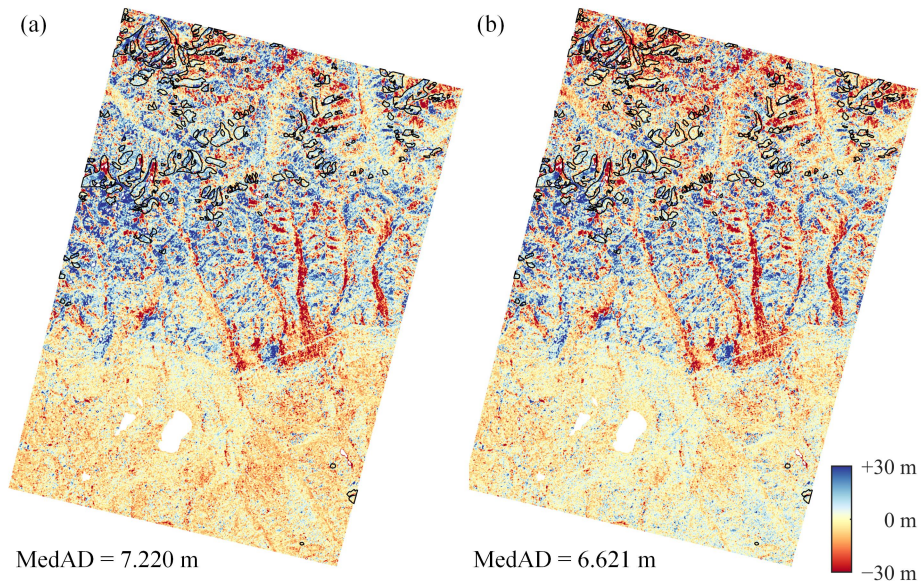

40

**Figure S3.** Co-registration results of the HMA-7 DEM pair. The NK method (a) and the RT method (b). The black lines mark the RGI 6.0 glacier outlines.

4) Significant attitude errors

As shown in Fig. S4, the ZY-3 DEM 20161202 of HMA-10 suffers from significant attitude errors. The RT method  
 45 effectively eliminates the residual trend in the northwest-southeast direction of the NK results.



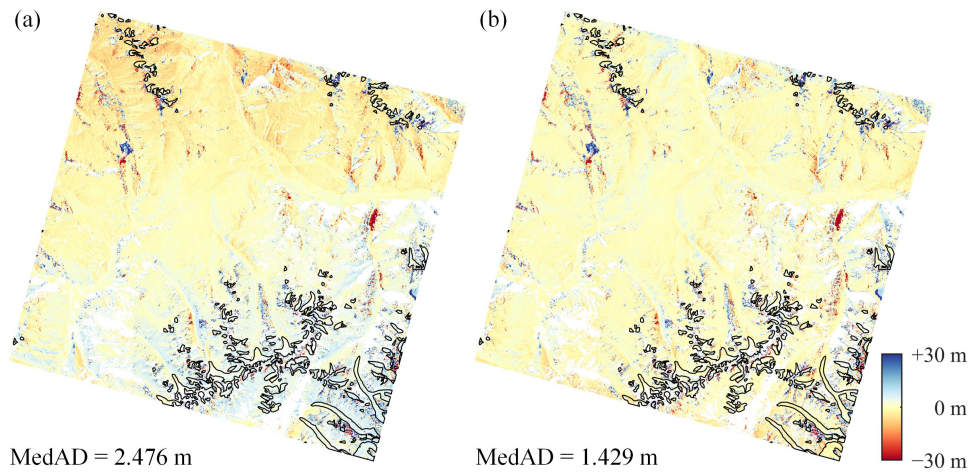

**Figure S4.** Co-registration results of the HMA-10 DEM pair. The NK method (a) and the RT method (b). The black lines mark the RGI 6.0 glacier outlines.

### 3. NZL case study

50 As shown in Fig. S5, we selected 11 DEM pairs (listed in Table S3) in the Southern Alps region of NZL for DEM co-registration experiments.

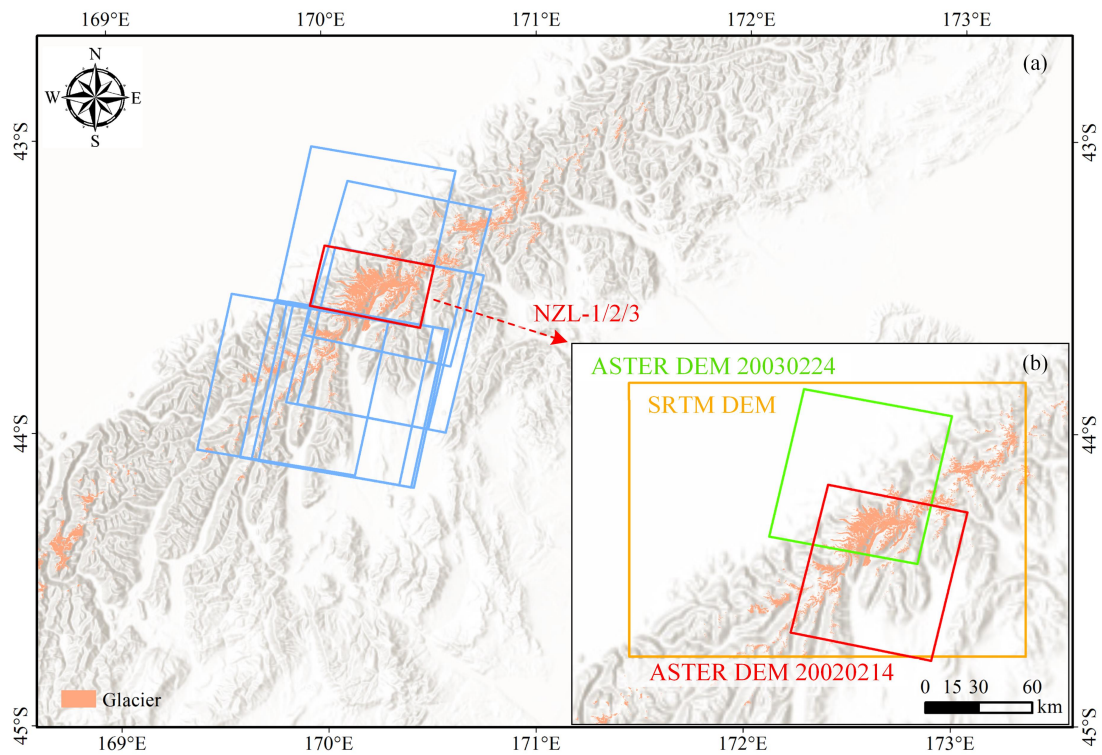

**Figure S5.** The study area located on NZL. (a) The footprints (blue) of the 11 DEM pairs, DEM pairs NZL-1/2/3 are highlighted in red. (b) The coverage of the three DEM images in NZL-1/2/3 (orange: SRTM DEM; red: ASTER DEM 20020214; green: ASTER DEM 20030224).  
 55 The glacierized areas are from the RGI 6.0 inventory.

**Table S3.** Co-registration results of the 11 DEM pairs in NZL. The MedAD values of the RT method are presented and compared with the linear version of the NK method.

| Pair ID | DEM   | Roles     | Date           | Resolu-<br>tion (m) | Scene ID                           | MedAD<br>(Reduced) |
|---------|-------|-----------|----------------|---------------------|------------------------------------|--------------------|
| NZL-1   | SRTM  | Reference | 11–22 Feb 2000 | 30                  | S44E169, S44E170                   | 5.627 (4.5%)       |
|         | ASTER | Secondary | 14 Feb 2002    | 30                  | AST14DEM.003:2013763401            |                    |
| NZL-2   | ASTER | Reference | 14 Feb 2002    | 30                  | AST14DEM.003:2013763401            | 5.966 (9.0%)       |
|         | ASTER | Secondary | 24 Feb 2003    | 30                  | AST14DEM.003:2011883607            |                    |
| NZL-3   | SRTM  | Reference | 11–22 Feb 2000 | 30                  | S44E169, S44E170                   | 6.871 (13.0%)      |
|         | ASTER | Secondary | 24 Feb 2003    | 30                  | AST14DEM.003:2011883607            |                    |
| NZL-4   | SRTM  | Reference | 11–22 Feb 2000 | 30                  | S44E169, S44E170                   | 6.136 (5.8%)       |
|         | ASTER | Secondary | 9 Feb 2006     | 30                  | AST14DEM.003:2033045873            |                    |
| NZL-5   | SRTM  | Reference | 11–22 Feb 2000 | 30                  | S44E169, S44E170                   | 6.278 (13.9%)      |
|         | ASTER | Secondary | 24 Feb 2003    | 30                  | AST14DEM.003:2011883607            |                    |
| NZL-6   | ASTER | Reference | 13 Mar 2021    | 30                  | AST14DEM.003:2438508389            | 9.002 (1.5%)       |
|         | ASTER | Secondary | 1 Apr 2022     | 30                  | AST14DEM.003:2543057148            |                    |
| NZL-7   | SRTM  | Reference | 11–22 Feb 2000 | 30                  | S44E169, S44E170, S45E169, S45E170 | 9.435 (10.0%)      |
|         | ASTER | Secondary | 30 Apr 2021    | 30                  | AST14DEM.003:2450214224            |                    |
| NZL-8   | SRTM  | Reference | 11–22 Feb 2000 | 30                  | S44E169, S44E170, S45E169, S45E170 | 6.491 (8.6%)       |
|         | ASTER | Secondary | 8 Mar 2019     | 30                  | AST14DEM.003:2331203149            |                    |
| NZL-9   | SRTM  | Reference | 11–22 Feb 2000 | 30                  | S44E169, S44E170, S45E169, S45E170 | 9.214 (15.7%)      |
|         | ASTER | Secondary | 24 May 2018    | 30                  | AST14DEM.003:2295763239            |                    |
| NZL-10  | SRTM  | Reference | 11–22 Feb 2000 | 30                  | S44E169, S44E170, S45E169, S45E170 | 16.626 (0.4%)      |
|         | ASTER | Secondary | 28 May 2022    | 30                  | AST14DEM.003:2549984322            |                    |
| NZL-11  | SRTM  | Reference | 11–22 Feb 2000 | 30                  | S44E169, S44E170, S45E169, S45E170 | 6.651 (1.0%)       |
|         | ASTER | Secondary | 9 Feb 2020     | 30                  | AST14DEM.003:2359064856            |                    |

Table S4 shows the co-registration results for the 11 DEM pairs of NZL. The RT method reduces up to 15.7% more co-  
 60 registration errors compared to the NK method.

**Table S4.** Co-registration results obtained with the 11 DEM pairs of NZL.

| Method                 | Average MedAD (m) |
|------------------------|-------------------|
| Before co-registration | 13.727            |
| NK standard version    | 8.656             |
| NK simplified version  | 8.657             |
| NK linear version      | 8.656             |
| RT                     | 8.027             |

As shown in Fig. S6c, the DEM pair NZL-3 contains a large number of unstable pixels (forest land, water, wetland, and  
 65 glacier and snow cover) on the west side of the image. The co-registration results in Fig. S6 a and b demonstrate that the RT  
 method reduces the error trend in the east-west direction of the NK results.



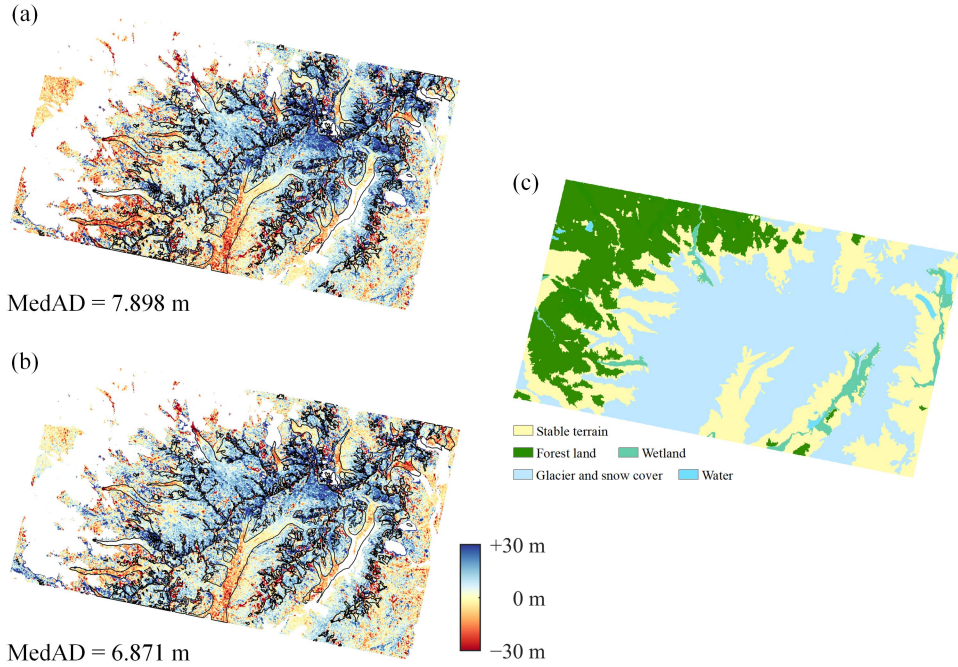

**Figure S6.** Co-registration results of the NZL-3 DEM pair. The NK method (a) and the RT method (b). The black lines mark the RGI 6.0 glacier boundaries. The land cover map from the GlobeLand30 product (c).

#### 4. The method of NH

70 In the DEM co-registration method of NH (Noh and Howat, 2014), the coordinate update equation is given by

$$\begin{bmatrix} X \\ Y \\ Z \end{bmatrix}_i = \begin{bmatrix} \Delta X \\ \Delta Y \\ \Delta Z \end{bmatrix} + sR_\omega R_\varphi R_\kappa \begin{bmatrix} X \\ Y \\ Z \end{bmatrix}_{i-1} \quad (\text{S1})$$

where  $R_\omega$ ,  $R_\varphi$  and  $R_\kappa$  are three rotation matrices derived from Euler angles.

$$\begin{aligned} R_\omega &= \begin{pmatrix} 1 & 0 & 0 \\ 0 & \cos(\omega) & -\sin(\omega) \\ 0 & \sin(\omega) & \cos(\omega) \end{pmatrix} \\ R_\varphi &= \begin{pmatrix} \cos(\varphi) & 0 & \sin(\varphi) \\ 0 & 1 & 0 \\ -\sin(\varphi) & 0 & \cos(\varphi) \end{pmatrix} \\ R_\kappa &= \begin{pmatrix} \cos(\kappa) & -\sin(\kappa) & 0 \\ \sin(\kappa) & \cos(\kappa) & 0 \\ 0 & 0 & 1 \end{pmatrix} \end{aligned} \quad (\text{S2})$$

The partial derivative of Eq. (S1) with respect to seven parameters (three translation parameters, one scale factor, and three Euler angles) is written as

$$\begin{bmatrix} dX \\ dY \\ dZ \end{bmatrix} = \begin{bmatrix} d\Delta X \\ d\Delta Y \\ d\Delta Z \end{bmatrix} + \begin{bmatrix} C_{11} \\ C_{21} \\ C_{31} \end{bmatrix} ds + \begin{bmatrix} C_{12} & C_{13} & C_{14} \\ C_{22} & C_{23} & C_{24} \\ C_{32} & C_{33} & C_{34} \end{bmatrix} \begin{bmatrix} d\omega \\ d\varphi \\ d\kappa \end{bmatrix} \quad (\text{S3})$$

where

$$\begin{aligned} C_{11} &= Z \sin(\varphi) + X \cos(\kappa) \cos(\varphi) - Y \cos(\varphi) \sin(\kappa) \\ C_{12} &= 0 \\ C_{13} &= sZ \cos(\varphi) + sY \sin(\kappa) \sin(\varphi) - sX \cos(\kappa) \sin(\varphi) \\ C_{14} &= -sY \cos(\kappa) \cos(\varphi) - sX \cos(\varphi) \sin(\kappa) \\ C_{21} &= X(\cos(\omega) \sin(\kappa) + \cos(\kappa) \sin(\omega) \sin(\varphi)) + Y(\cos(\kappa) \cos(\omega) - \sin(\kappa) \sin(\omega) \sin(\varphi)) - Z \cos(\varphi) \sin(\omega) \\ C_{22} &= -sX(\sin(\kappa) \sin(\omega) - \cos(\kappa) \cos(\omega) \sin(\varphi)) - sY(\cos(\kappa) \sin(\omega) + \cos(\omega) \sin(\kappa) \sin(\varphi)) - sZ \cos(\omega) \cos(\varphi) \\ C_{23} &= sZ \sin(\omega) \sin(\varphi) + sX \cos(\kappa) \cos(\varphi) \sin(\omega) - sY \cos(\varphi) \sin(\kappa) \sin(\omega) \\ C_{24} &= sX(\cos(\kappa) \cos(\omega) - \sin(\kappa) \sin(\omega) \sin(\varphi)) - sY(\cos(\omega) \sin(\kappa) + \cos(\kappa) \sin(\omega) \sin(\varphi)) \\ C_{31} &= X(\sin(\kappa) \sin(\omega) - \cos(\kappa) \cos(\omega) \sin(\varphi)) + Y(\cos(\kappa) \sin(\omega) + \cos(\omega) \sin(\kappa) \sin(\varphi)) + Z \cos(\omega) \cos(\varphi) \\ C_{32} &= sX(\cos(\omega) \sin(\kappa) + \cos(\kappa) \sin(\omega) \sin(\varphi)) + sY(\cos(\kappa) \cos(\omega) - \sin(\kappa) \sin(\omega) \sin(\varphi)) - sZ \cos(\varphi) \sin(\omega) \\ C_{33} &= sY \cos(\omega) \cos(\varphi) \sin(\kappa) - sX \cos(\kappa) \cos(\omega) \cos(\varphi) - sZ \cos(\omega) \sin(\varphi) \\ C_{34} &= sX(\cos(\kappa) \sin(\omega) + \cos(\omega) \sin(\kappa) \sin(\varphi)) - sY(\sin(\kappa) \sin(\omega) - \cos(\kappa) \cos(\omega) \sin(\varphi)) \end{aligned} \quad (\text{S4})$$

The above equations are Eqs. (19–21) in Noh and Howat (2014). Considering that the Euler angles are nearly equal to zero in DEM co-registration tasks, Eq. (S3) can be approximated by

$$\begin{bmatrix} dX \\ dY \\ dZ \end{bmatrix} \approx \begin{bmatrix} d\Delta X \\ d\Delta Y \\ d\Delta Z \end{bmatrix} + \begin{bmatrix} X \\ Y \\ Z \end{bmatrix} ds + s \begin{bmatrix} 0 & Z & -Y \\ -Z & 0 & X \\ Y & -X & 0 \end{bmatrix} \begin{bmatrix} d\omega \\ d\varphi \\ d\kappa \end{bmatrix} \quad (\text{S5})$$

It can be seen that Eq. (S5) is equivalent to the Eq. (11) used in the method of Rosenholm and Torlegard.

## References:

- 85 Noh, M. and Howat, I. M.: Automated Coregistration of Repeat Digital Elevation Models for Surface Elevation Change Measurement Using Geometric Constraints, IEEE Trans. Geosci. Remote Sensing, 52, 2247–2260, <https://doi.org/10.1109/TGRS.2013.2258928>, 2014.
